# Supplementary material for: An 8-week physical exercise intervention for e'athletes improves physical performance rather than short-term esports performance parameters - a randomized controlled trial
Source: PubMed Central journal article supplement (PMC11790659; doi:10.3389/fspor.2024.1504205), 2025-01-21
Supplement: Datasheet1.pdf [file Datasheet1.pdf]

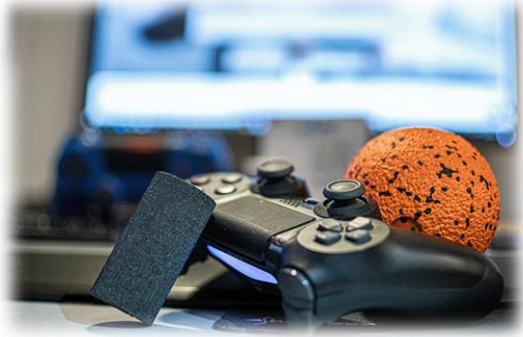

## Training Plan Day 1

---

### Warm-Up

2 minutes Ankle Rocking with Arm Circles  
[V01]

3 minutes light Jogging in place [V02]

10 light Lunges [V03]

---

### Exercise Block 1

Tabata 1: each exercise 6 times  
20s intensity / 20s rest = 8 minutes

A: Jumping Jack [V09]

B: Frontal Mountain Climber [V10]

---

### Exercise Block 2

Tabata 2: each exercise 6 times  
20s intensity / 20s rest = 8 minutes

A: Shadowboxing [V06]

B: High Knees [V05]

---

### Cool-Down

Relaxation Circuit [V27]

---



## Training Plan Day 2

---

### Warm-Up

2 minutes High Knees with Arm Circles  
[V12]

3 minutes light Skating in place [V13]

20 light Squats [V14]

---

### Exercise Block 1

Tabata 1: each exercise 6 times  
20s intensity / 20s rest = 8 minutes

A: Push-up to Stand [V04]

B: High Knees [V05]

---

### Exercise Block 2

Tabata 2: each exercise 6 times  
20s intensity / 20s rest = 8 minutes

A: Tappings [V18]

B: Russian Twist [V19]

---

### Cool-Down

Relaxation Circuit [V27]

---



## Training Plan Day 3

---

|                  |                                                                                                                                               |
|------------------|-----------------------------------------------------------------------------------------------------------------------------------------------|
|                  | 2 minutes Side Steps with Arm Extensions<br>(arms twice as fast as legs) [V20]                                                                |
| Warm-Up          | 3 minutes light Jumping Rope without a<br>rope [V21]<br><br>20 light Jumping Jacks [V09]                                                      |
| Exercise Block 1 | Tabata 1: each exercise 6 times<br>20s intensity / 20s rest = 8 minutes<br><br>A: Squat Jumps [V23]<br>B: Side-to-Side Mountain Climber [V24] |
| Exercise Block 2 | Tabata 2: each exercise 6 times<br>20s intensity / 20s rest = 8 minutes<br><br>A: Jump Squats [V25]<br>B: Plank [V26]                         |
| Cool-Down        | Relaxation Circuit [V27]                                                                                                                      |

---
