# Supplementary material for: An 8-week physical exercise intervention for e'athletes improves physical performance rather than short-term esports performance parameters - a randomized controlled trial
Source: PubMed Central journal article supplement (PMC11790659; doi:10.3389/fspor.2024.1504205), 2025-01-21
Supplement: Datasheet2.pdf [file Datasheet2.pdf]

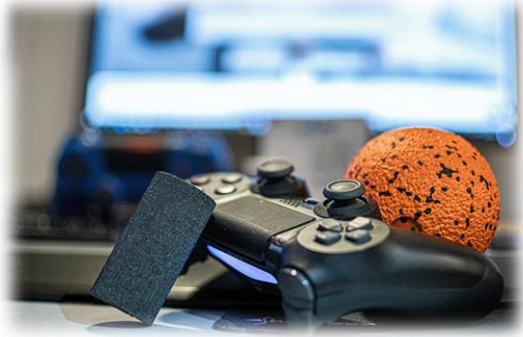

## Training Plan Day 1

---

|                  |                                                                                             |
|------------------|---------------------------------------------------------------------------------------------|
|                  | 2 minutes Ankle Rocking with Arm Circles [V01]                                              |
| Warm-Up          | 3 minutes light Jogging in place [V02]                                                      |
|                  | 10 light Lunges [V03]                                                                       |
| <hr/>            |                                                                                             |
| Exercise Block 1 | Tabata 1: each exercise 6 times<br>20s intensity / 20s rest = 8 minutes                     |
|                  | A: Push-up to Stand [V04]<br>B: High Knees [V05]                                            |
| <hr/>            |                                                                                             |
| Exercise Block 2 | 4 sets of 12 repetitions of<br>„Towel Squeeze“ [V28]<br>2 minutes rest between sets         |
| <hr/>            |                                                                                             |
| Exercise Block 3 | „Reflex Test“ with each finger, followed by<br>alternating 5 Jumping Jacks and Squats [V07] |
| <hr/>            |                                                                                             |
| Exercise Block 4 | 30x throw a ball, close your eyes, and clap when<br>it should hit the ground [V08]          |
| <hr/>            |                                                                                             |
| Cool-Down        | Relaxation Circuit [V27]                                                                    |
| <hr/>            |                                                                                             |



## Training Plan Day 2

---

|         |                                             |
|---------|---------------------------------------------|
| Warm-Up | 2 minutes High Knees with Arm Circles [V12] |
|         | 3 minutes light Skating in place [V13]      |
|         | 20 light Squats [V14]                       |

---

|                  |                                                                                             |
|------------------|---------------------------------------------------------------------------------------------|
| Exercise Block 1 | 5x: 20 seconds FingerRow with Ankle Rocking<br>and 20 seconds FingerRow with Tappings [V15] |
|                  | 30 seconds rest                                                                             |

---

|                  |                                                                             |
|------------------|-----------------------------------------------------------------------------|
| Exercise Block 2 | 5 minutes „Color Challenge“ on your phone while<br>alternating Lunges [V16] |
|------------------|-----------------------------------------------------------------------------|

---

|                  |                                                                |
|------------------|----------------------------------------------------------------|
| Exercise Block 3 | „Reflex Test“ with each finger followed by 5<br>Push-ups [V07] |
|------------------|----------------------------------------------------------------|

---

|                  |                                                                        |
|------------------|------------------------------------------------------------------------|
| Exercise Block 4 | 5 minutes left/right jumps with clapping exactly<br>when landing [V17] |
|------------------|------------------------------------------------------------------------|

---

|           |                          |
|-----------|--------------------------|
| Cool-Down | Relaxation Circuit [V27] |
|-----------|--------------------------|

---



## Training Plan Day 3

---

|                  |                                                                                                                                                                 |
|------------------|-----------------------------------------------------------------------------------------------------------------------------------------------------------------|
|                  | 2 minutes Side Steps with arm extensions (arms twice as fast as legs) [V20]                                                                                     |
| Warm-Up          | 3 minutes light Jumping Rope without a rope [V21]<br><br>20 light Jumping Jacks [V09]                                                                           |
| Exercise Block 1 | 4 sets of 12 repetitions<br>„Towel Squeeze“ [V28]<br>2 minutes rest between sets                                                                                |
| Exercise Block 2 | Eye video 1&2 alternately during Tabata<br>Tabata: each exercise 6 times<br>20s intensity / 20s rest = 8 minutes<br><br>A: Jump Squats [V25]<br>B: Lunges [V03] |
| Exercise Block 3 | „Reflex Test“ with each finger, followed by 20<br>Skippings [V07]                                                                                               |
| Exercise Block 4 | 3 minutes Anticipation Video 1&2 alternately, with<br>clapping at the midpoint during Squats [V14]                                                              |
| Cool-Down        | Relaxation Circuit [V27]                                                                                                                                        |

---
