# Supplementary material for: An 8-week physical exercise intervention for e'athletes improves physical performance rather than short-term esports performance parameters - a randomized controlled trial
Source: Front Sports Act Living. 2025 Jan 21;6:1504205. doi: 10.3389/fspor.2024.1504205 (PMC11790659; doi:10.3389/fspor.2024.1504205)
Supplement: Supplementary file 3 [file Table1.xlsx]

## Sheet: specific
Interventions
3 days/week		Exercise	Description	Time/Repetitions
Day 1	Warm-Up	Ankle Rocking with Arm Circles	Stand up straight, with your feet shoulder-width apart. Start rocking forwards and backwards while making circular motions with both arms. Change the direction of the circles after a few seconds.	2 minutes
		Light Jogging in place	Simply jog in place without exerting yourself too much. Make sure to swing your arms loosely and lift your knees slightly.	3 minutes
		Light Lunges	Stand tall with your feet hip-width apart. Take a big step forward with one leg and bend both knees until your back knee nearly touches the ground. Hold this position for a few seconds, then push back with the front leg to return to the starting position. Repeat the exercise with the other leg. To increase intensity: Hold a dumbbell in each hand or add a small jump after each lunge.	10 Lunges/side
	1 minute rest
	Strength/Endurance	Tabata A: Push-up to Stand B: High Knees	This interval training consists of 2 exercises: A: Lie face down and support yourself with your hands and toes. Your hands should be directly under your shoulders and your body should form a straight line. Tighten your core and push yourself up until your arms are straight. Lower yourself back down until your chest almost touches the ground. Repeat this movement as many times as possible in 20 se…	8 minutes each exercise 6 times 20s intensity / 20s rest
	1 minute rest
	Focus exercises	Towel Squeeze	Take a towel or a sweater in your hand, gripping it just enough so that your fingers and thumb are almost touching but not quite. Squeeze as hard as you can and count silently to 3. Repeat this process 12 times.	4 sets of 12 repetitions 2 minutes rest between sets
		LightsOut with each finger, followed by alternating Jumping Jacks	Take your smartphone and open the LightsOut app. This app measures your reaction time with reflex tests. You have 5 attempts per round. Use a different finger for each attempt. After each attempt, do 5 Jumping Jacks. Jumping Jacks: Start from standing position, jump out to a wide stance while raising your arms overhead. Jump back to shoulder-width stance and bring your hands together behind your …	each finger 1x
		Throw a ball, close your eyes and clap when it should hit the ground	Hold a ball in your hands. Throw it straight up into the air and close your eyes before it reaches its highest point. Try to clap your hands together when you think the ball is about to hit the ground.	throwing the ball 30x
	1 minute rest
	Cool-Down	Relaxation Circuit	Perform this movement slowly and mindfully. Step forward with your left leg into a lunge position, then place your right hand next to your left foot. Open your torso and extend your left arm upward. Next, thread your left arm under your right arm. Place your left hand next to your left foot, straighten the back leg, then the front leg, stand up, and slowly return to the starting position. Repeat …	1 time left and 1 time right
		Exercise	Description	Time/Repetitions
Day 2	Warm-Up	High Knees with Arm Circles	Jog in place and alternately lift each leg to just above hip height, pulling your toes up. At the same time, circle your arms forward, and after a few seconds, switch directions.	2 minutes
		Light Skating in place	Stand upright and slightly bend your knees. Take a big step to the side with your right leg and bend it, while extending your left leg behind your right leg and touching the ground with your left foot. Then switch sides. Move rhythmically from left to right, as if you were ice skating.	3 minutes
		Light Squats	Stand upright with your feet slightly more than shoulder-width apart. Point your toes slightly outward. Tighten your core and keep your back straight. Lower your buttocks down and back, as if you are sitting in a chair. Make sure your knees do not go past your toes. Go as low as comfortable for you, then push back up to the starting position.	20x
	1 minute rest
	Focus exercises	FingerRow with Tappings	Perform quick foot taps during this exercise. Meanwhile, do the FingerRow with both hands. In this finger exercise, keep the fingers that are not moving relaxed and either completely apart or intentionally extended. Focus on the contact between each pair of fingers. Stand upright, raise your hands to about shoulder height. First, bring your thumb and index finger together. Then touch your thumb t…	3 minutes
		Color Challenge while alternating Lunges	Take your smartphone and open the Color Challenge app. The goal of this game is to quickly identify the color or its name. While playing, perform alternating lunges, stepping forward with one leg and then the other. Stand upright, take a large step forward with one leg. Keep your front knee behind your toes and let your back knee almost touch the ground. Push back up with the front leg and switch…	5 minutes
		LightsOut with each finger, followed by Push-ups	Take your smartphone and open the LightsOut app. This app measures your reaction time with reflex tests. In each round, you have 5 attempts. Use a different finger for each attempt. After each attempt, do 5 Push-ups. Push-ups: Lie face down and support yourself with your hands and toes. Your hands should be directly under your shoulders, and your body should form a straight line. Tighten your cor…	each finger 1x
		Left/right jumps with clapping exactly when landing	Alternate jumping to the left and right, clapping each time you land or just before or after. The goal is to find and maintain a steady rhythm.	5 minutes
	1 minute rest
	Cool-Down	Relaxation Circuit	Perform this movement slowly and mindfully. Step forward with your left leg into a lunge position, then place your right hand next to your left foot. Open your torso and extend your left arm upward. Next, thread your left arm under your right arm. Place your left hand next to your left foot, straighten the back leg, then the front leg, stand up, and slowly return to the starting position. Repeat …	1 time left and 1 time right
		Exercise	Description	Time/Repetitions
Day 3	Warm-Up	Side Steps with Arm Extensions	Stand upright and take a big step to the side with both legs. Your arms are bent at the sides. When stepping to the right, your left arm extends out, and when stepping to the left, your right arm extends out. The movement of the hands is twice as fast as the step itself. For instance, if you step left once, your right arm will move out and in twice during that time. To increase intensity: Perform…	2 minutes
		Light Jumping Rope without a rope	Imagine you have a rope in your hands and jump with both feet simultaneously as if you are jumping over the imaginary rope. Rotate your wrists as if you are swinging the rope. To increase intensity: jump faster or higher, or change the jumping variation (e.g., one-legged, sideways, forward-backward).	3 minutes
		Light Jumping Jacks	Jump from a standing position into a wide stance while simultaneously raising your arms overhead. Then, jump back to shoulder-width stance and bring your hands together behind your back.	20x
	1 minute rest
	Strength/Endurance	Towel Squeeze	Take a towel or a sweater in your hand, gripping it just enough so your fingers and thumb are barely touching. Squeeze as hard as you can and count silently to 3. Repeat this process 12 times.	4 sets of 12 repetitions 2 minutes rest between sets
		Eye Video during Tabata	During the next two exercises (Tabata), watch Eye Videos 1&2 to relax and train your eyes. The video displays a black circle that you should track with your eyes.	8 minutes each exercise 6 times 20s intensity / 20s rest
		Tabata A: Jump Squats B: Plank	This interval training consists of 2 exercises: A: Stand upright with your feet hip-width apart and arms by your sides. Shift your weight onto your toes and lower your torso straight down. Then, jump as high as possible into the air, extending your arms and legs. Land back in the starting position and repeat the jump. Perform this movement as many times as possible in 20 seconds. B: Lie face down…
	1 minute rest
	Focus exercises	LightsOut with each finger, followed by Skippings	Take your smartphone and open the LightsOut app. This app measures your reaction time with reflex tests. In each round, you have 5 attempts. Use a different finger for each attempt. After each attempt, do 20 skippings. Skippings: Stand with your feet hip-width apart and slightly bend your knees. Alternately lift your feet quickly off the ground and then land them back down. Google PlayStore: http…	each finger 1x
		Anticipation video during Squats, and clapping at midpoint	Watch Anticipation Videos 1&2 alternately and on a loop while performing squats. Each time the black ball crosses the center, clap your hands.	3 minutes
	1 minute rest
	Cool-Down	Relaxation Circuit	Perform this movement slowly and mindfully. Step forward with your left leg into a lunge position, then place your right hand next to your left foot. Open your torso and extend your left arm upward. Next, thread your left arm under your right arm. Place your left hand next to your left foot, straighten the back leg, then the front leg, stand up, and slowly return to the starting position. Repeat …	1 time left and 1 time right

## Sheet: general
Interventions
3 days/week		Exercise	Description	Time/Repetitions
Day 1	Warm-Up	Ankle Rocking with Arm Circles	Stand up straight, with your feet shoulder-width apart. Start rocking forwards and backwards while making circular motions with both arms. Change the direction of the circles after a few seconds.	2 minutes
		Light Jogging in place	Simply jog in place without exerting yourself too much. Make sure to swing your arms loosely and lift your knees slightly.	3 minutes
		Light Lunges	Stand tall with your feet hip-width apart. Take a big step forward with one leg and bend both knees until your back knee nearly touches the ground. Hold this position for a few seconds, then push back with the front leg to return to the starting position. Repeat the exercise with the other leg. To increase intensity: Hold a dumbbell in each hand or add a small jump after each lunge.	10 Lunges/side
	1 minute rest
	Strength/Endurance	Tabata 1 A: Jumping Jacks B: Frontal Mountain Climber	This interval training consists of 2 exercises: A: Stand upright and jump with your legs apart. Raise your arms overhead and clap your hands together. Jump back to the starting position and lower your arms back to your sides. B: Start in a high plank position, with your hands under your shoulders, your back straight, and your feet hip-width apart. Bring your right knee forward as far as possible …	8 minutes each exercise 6 times 20s intensity / 20s rest
		Tabata 2 A: Shadowboxing B: High Knees	This interval training consists of 2 exercises: A: Assume a boxing stance like a real boxer, without a physical opponent. Move lightly on the spot, throw punches into the air, and dodge imaginary attacks. Keep your legs moving with small steps to stay active. Use your imagination to simulate different combat scenarios. B: Jog on the spot and alternately raise each leg slightly above hip height. P…	8 minutes each exercise 6 times 20s intensity / 20s rest
	1 minute rest
	Cool-Down	Relaxation Circuit	Perform this movement slowly and mindfully. Step forward with your left leg into a lunge position, then place your right hand next to your left foot. Open your torso and extend your left arm upward. Next, thread your left arm under your right arm. Place your left hand next to your left foot, straighten the back leg, then the front leg, stand up, and slowly return to the starting position. Repeat …	1 time left and 1 time right
		Exercise	Description	Time/Repetitions
Day 2	Warm-Up	High Knees with Arm Circles	Jog in place and alternately lift each leg to just above hip height, pulling your toes up. At the same time, circle your arms forward, and after a few seconds, switch directions.	2 minutes
		Light Skating in place	Stand upright and slightly bend your knees. Take a big step to the side with your right leg and bend it, while extending your left leg behind your right leg and touching the ground with your left foot. Then switch sides. Move rhythmically from left to right, as if you were ice skating.	3 minutes
		Light Squats	Stand upright with your feet slightly more than shoulder-width apart. Point your toes slightly outward. Tighten your core and keep your back straight. Lower your buttocks down and back, as if you are sitting in a chair. Make sure your knees do not go past your toes. Go as low as comfortable for you, then push back up to the starting position.	20x
	1 minute rest
	Strength/Endurance	Tabata 1 A: Push-up to Stand B: High Knees	This interval training consists of 2 exercises: A: Lie face down and support yourself with your hands and toes. Your hands should be directly under your shoulders, and your body should form a straight line. Tighten your core and push yourself up until your arms are straight. Lower yourself back down until your chest almost touches the ground. Repeat this movement as many times as possible in 20 s…	8 minutes each exercise 6 times 20s intensity / 20s rest
		Tabata 2 A: Tappings B: Russian Twist	This interval training consists of 2 exercises: A: Stand hip-width apart and slightly bend your knees. Quickly lift each foot off the ground alternately and place it back down. Move your arms as if sprinting. Perform this exercise as fast as possible for 20 seconds. B: Sit on the ground and lean back slightly so your upper body forms a 45° angle with the floor. Lift your legs slightly and keep th…	8 minutes each exercise 6 times 20s intensity / 20s rest
	1 minute rest
	Cool-Down	Relaxation Circuit	Perform this movement slowly and mindfully. Step forward with your left leg into a lunge position, then place your right hand next to your left foot. Open your torso and extend your left arm upward. Next, thread your left arm under your right arm. Place your left hand next to your left foot, straighten the back leg, then the front leg, stand up, and slowly return to the starting position. Repeat …	1 time left and 1 time right
		Exercise	Description	Time/Repetitions
Day 3	Warm-Up	Side Steps with Arm Extensions	Stand upright and take a big step to the side with both legs. Your arms are bent at the sides. When stepping to the right, your left arm extends out, and when stepping to the left, your right arm extends out. The movement of the hands is twice as fast as the step itself. For instance, if you step left once, your right arm will move out and in twice during that time. To increase intensity: Perform…	2 minutes
		Light Jumping Rope without a rope	Imagine you have a rope in your hands and jump with both feet simultaneously as if you are jumping over the imaginary rope. Rotate your wrists as if you are swinging the rope. To increase intensity: jump faster or higher, or change the jumping variation (e.g., one-legged, sideways, forward-backward).	3 minutes
		Light Jumping Jacks	Jump from a standing position into a wide stance while simultaneously raising your arms overhead. Then, jump back to shoulder-width stance and bring your hands together behind your back.	20x
	1 minute rest
	Strength/Endurance	Tabata 1 A: Squat Jumps B: Side-to-Side Mountain Climber	This interval training consists of 2 exercises: A: Begin in a deep squat position, with your feet shoulder-width apart and your knees not extending past your toes. Jump as high as possible out of the squat and extend your arms overhead. Repeat this movement as many times as possible in 20 seconds. B: Start in a high plank position, with your hands under your shoulders, your back straight, and you…	8 minutes each exercise 6 times 20s intensity / 20s rest
		Tabata 2 A: Jump Squats B: Plank	This interval training consists of 2 exercises: A: Stand upright with your feet hip-width apart and arms by your sides. Jump as high as possible into the air, extending your arms and legs. Land back in the starting position and repeat the jump as many times as possible in 20 seconds. B: Lie face down on the floor and support yourself on your forearms and toes. Your body should form a straight lin…	8 minutes each exercise 6 times 20s intensity / 20s rest
	1 minute rest
	Cool-Down	Relaxation Circuit	Perform this movement slowly and mindfully. Step forward with your left leg into a lunge position, then place your right hand next to your left foot. Open your torso and extend your left arm upward. Next, thread your left arm under your right arm. Place your left hand next to your left foot, straighten the back leg, then the front leg, stand up, and slowly return to the starting position. Repeat …	1 time left and 1 time right
